# Supplementary material
Source: MDPI journal article supplement (https://www.mdpi.com/2410-3888/7/2/56)
Supplement: s1 [file s1]

## Supplementary data

**Table S1.** Fitness. Experimental results of the change in pCO<sub>2</sub> (delta CO<sub>2</sub>: second CO<sub>2</sub> minus first CO<sub>2</sub>) and its impact on fitness during life stages 1=embryo, 2= larva, 3=juvenile, and 4=adult. In elasmobranch/bony fish, 1= elasmobranch and 0= bony fish. A value of 1 for fitness represents a negative impact on fish fitness.

| Article code | CO <sub>2</sub> first (μatm) | CO <sub>2</sub> second (μatm) | Delta CO <sub>2</sub> (μatm) | Elasmobranch /bony fish | Life stage | Fitness |
|--------------|------------------------------|-------------------------------|------------------------------|-------------------------|------------|---------|
| 1            | 405                          | 1064                          | 659                          | 1                       | 4          | 1       |
| 3            | 400                          | 1000                          | 600                          | 1                       | 3          | 1       |
| 4            | 400                          | 1000                          | 600                          | 1                       | 3          | 1       |
| 5            | 401                          | 993                           | 592                          | 1                       | 3          | 1       |
| 6            | 420                          | 945                           | 525                          | 1                       | 1          | 1       |
| 7            | 400                          | 910                           | 510                          | 1                       | 2          | 0       |
| 8            | 397                          | 876                           | 479                          | 1                       | 3          | 1       |
| 9            | 382                          | 1481                          | 1099                         | 1                       | 3          | 1       |
| 10           | 382                          | 1481                          | 1099                         | 1                       | 3          | 1       |
| 11           | 382                          | 1481                          | 1099                         | 1                       | 3          | 1       |
| 12           | 551                          | 1060                          | 509                          | 1                       | 3          | 1       |
| 13           | 411                          | 891                           | 480                          | 1                       | 3          | 1       |
| 14           | 411                          | 891                           | 480                          | 1                       | 3          | 1       |
| 15           | 465                          | 1477                          | 1012                         | 0                       | 4          | 1       |
| 22           | 397                          | 1036                          | 639                          | 0                       | 3          | 0       |
| 23           | 450                          | 961                           | 511                          | 0                       | 4          | 1       |
| 25           | 483                          | 1125                          | 642                          | 0                       | 3          | 1       |
| 28           | 459                          | 2294                          | 1835                         | 0                       | 1          | 1       |
| 29           | 422                          | 1115                          | 693                          | 1                       | 1          | 1       |
| 30           | 532                          | 1013                          | 481                          | 0                       | 3          | 0       |
| 32           | 468                          | 885                           | 417                          | 0                       | 2          | 1       |
| 33           | 464                          | 1051                          | 587                          | 0                       | 2          | 0       |
| 35           | 374                          | 994                           | 620                          | 0                       | 4          | 1       |
| 36           | 410                          | 1121                          | 711                          | 1                       | 3          | 1       |
| 38           | 549                          | 983                           | 434                          | 0                       | 3          | 0       |
| 42           | 424                          | 1012                          | 588                          | 0                       | 3          | 1       |
| 44           | 475                          | 877                           | 402                          | 0                       | 2          | 1       |
| 45           | 370                          | 1050                          | 680                          | 0                       | 4          | 1       |
| 46           | 406                          | 945                           | 539                          | 0                       | 4          | 0       |
| 47           | 356                          | 2015                          | 1659                         | 0                       | 2          | 1       |
| 52           | 400                          | 1000                          | 600                          | 1                       | 4          | 1       |
| 53           | 700                          | 1600                          | 900                          | 0                       | 4          | 1       |
| 55           | 424                          | 1012                          | 588                          | 0                       | 3          | 1       |
| 56           | 703                          | 2290                          | 1587                         | 1                       | 3          | 1       |
| 57           | 516                          | 1489                          | 973                          | 0                       | 3          | 1       |
| 58           | 386                          | 2184                          | 1798                         | 1                       | 3          | 1       |
| 59           | 404                          | 980                           | 576                          | 0                       | 3          | 1       |
| 60           | 462                          | 959                           | 497                          | 0                       | 3          | 1       |
| 61           | 400                          | 1000                          | 600                          | 0                       | 4          | 1       |
| 62           | 442                          | 915                           | 473                          | 1                       | 3          | 0       |
| 63           | 590                          | 980                           | 390                          | 0                       | 4          | 0       |
| 64           | 650                          | 1750                          | 1100                         | 0                       | 4          | 1       |

| Article code | CO <sub>2</sub> first (μatm) | CO <sub>2</sub> second (μatm) | Delta CO <sub>2</sub> (μatm) | Elasmobranch /bony fish | Life stage | Fitness |
|--------------|------------------------------|-------------------------------|------------------------------|-------------------------|------------|---------|
| 65           | 435                          | 1079                          | 644                          | 0                       | 4          | 1       |
| 66           | 400                          | 1100                          | 700                          | 0                       | 2          | 1       |
| 67           | 401                          | 13000                         | 12599                        | 1                       | 4          | 1       |
| 79           | 532                          | 1013                          | 481                          | 0                       | 3          | 0       |
| 81           | 385                          | 925                           | 540                          | 0                       | 4          | 1       |
| 87           | 391                          | 876                           | 485                          | 0                       | 3          | 1       |

**Table S2.** Mortality. Experimental results of the change in pCO<sub>2</sub> (delta CO<sub>2</sub>) and its impact on mortality during life stages 1=embryo, 2= larva, 3=juvenile, or 4=adult. In elasmobranch/bony fish, 1= elasmobranch and 0= bony fish. A value of 1 for fitness represents a negative impact on fish fitness.

| Article code | CO <sub>2</sub> first (μatm) | CO <sub>2</sub> second (μatm) | Delta CO <sub>2</sub> (μatm) | Elasmobranch /bony fish | Life stage | Mortality |
|--------------|------------------------------|-------------------------------|------------------------------|-------------------------|------------|-----------|
| 6            | 420                          | 945                           | 525                          | 1                       | 1          | 1         |
| 11           | 382                          | 1481                          | 1099                         | 1                       | 3          | 1         |
| 12           | 551                          | 1060                          | 509                          | 1                       | 3          | 1         |
| 13           | 411                          | 891                           | 480                          | 1                       | 3          | 0         |
| 14           | 411                          | 891                           | 480                          | 1                       | 3          | 0         |
| 22           | 397                          | 1036                          | 639                          | 0                       | 3          | 0         |
| 28           | 459                          | 2294                          | 1835                         | 0                       | 1          | 1         |
| 29           | 422                          | 1115                          | 693                          | 1                       | 1          | 1         |
| 32           | 468                          | 885                           | 417                          | 0                       | 2          | 0         |
| 44           | 475                          | 877                           | 402                          | 0                       | 2          | 1         |
| 53           | 700                          | 1600                          | 900                          | 0                       | 4          | 1         |
| 65           | 435                          | 1079                          | 644                          | 0                       | 4          | 1         |
| 66           | 400                          | 1100                          | 700                          | 0                       | 2          | 1         |
| 87           | 391                          | 876                           | 485                          | 0                       | 3          | 1         |

**Table S3.** Behavior avoidance. Experimental results of the change in pCO<sub>2</sub> (delta CO<sub>2</sub>) and its impact on behavior avoidance, during life stages 1=embryo, 2= larva, 3=juvenile, and 4=adult. In elasmobranch/bony fish, 1= elasmobranch and 0= bony fish. A value of 1 for fitness represents a negative impact on fish fitness.

| Article code | CO <sub>2</sub> first (μatm) | CO <sub>2</sub> second (μatm) | Delta CO <sub>2</sub> (μatm) | Elasmobranch /bony fish | Life stage | Behavior avoidance |
|--------------|------------------------------|-------------------------------|------------------------------|-------------------------|------------|--------------------|
| 1            | 405                          | 1064                          | 659                          | 1                       | 4          | 1                  |
| 3            | 400                          | 1000                          | 600                          | 1                       | 3          | 1                  |
| 4            | 400                          | 1000                          | 600                          | 1                       | 3          | 1                  |
| 5            | 401                          | 993                           | 592                          | 1                       | 3          | 1                  |
| 7            | 400                          | 910                           | 510                          | 1                       | 2          | 0                  |
| 11           | 382                          | 1481                          | 1099                         | 1                       | 3          | 1                  |
| 12           | 551                          | 1060                          | 509                          | 1                       | 3          | 1                  |
| 13           | 411                          | 891                           | 480                          | 1                       | 3          | 1                  |
| 14           | 411                          | 891                           | 480                          | 1                       | 3          | 1                  |
| 15           | 465                          | 1477                          | 1012                         | 0                       | 4          | 1                  |
| 23           | 450                          | 961                           | 511                          | 0                       | 4          | 1                  |
| 25           | 483                          | 1125                          | 642                          | 0                       | 3          | 1                  |
| 33           | 464                          | 1051                          | 587                          | 0                       | 2          | 0                  |
| 35           | 374                          | 994                           | 620                          | 0                       | 4          | 1                  |
| 36           | 410                          | 1121                          | 711                          | 1                       | 3          | 1                  |
| 38           | 549                          | 983                           | 434                          | 0                       | 3          | 0                  |
| 42           | 424                          | 1012                          | 588                          | 0                       | 3          | 1                  |
| 44           | 475                          | 877                           | 402                          | 0                       | 2          | 1                  |
| 45           | 370                          | 1050                          | 680                          | 0                       | 4          | 1                  |
| 46           | 406                          | 945                           | 539                          | 0                       | 4          | 0                  |
| 47           | 356                          | 2015                          | 1659                         | 0                       | 2          | 1                  |
| 53           | 700                          | 1600                          | 900                          | 0                       | 4          | 1                  |
| 55           | 424                          | 1012                          | 588                          | 0                       | 3          | 1                  |
| 59           | 404                          | 980                           | 576                          | 0                       | 3          | 1                  |
| 60           | 462                          | 959                           | 497                          | 0                       | 3          | 1                  |
| 61           | 400                          | 1000                          | 600                          | 0                       | 4          | 1                  |
| 79           | 532                          | 1013                          | 481                          | 0                       | 3          | 0                  |
| 81           | 385                          | 925                           | 540                          | 0                       | 4          | 1                  |
| 87           | 391                          | 876                           | 485                          | 0                       | 3          | 1                  |
